# Supplementary material
Source: PubMed Central journal article supplement (PMC6640494)
Supplement: MPP-12-786-s002.pdf [file MPP-12-786-s002.pdf]

**Supplemental Table 1** Differentially expressed genes significant in more than one interaction.

| GenBank<br>Accession                                       | TIGR TC<br>v.9 | Functional Category<br>Gene Annotation                                                 | Fold Change    |                    |                           |
|------------------------------------------------------------|----------------|----------------------------------------------------------------------------------------|----------------|--------------------|---------------------------|
|                                                            |                |                                                                                        | <i>E. pisi</i> | <i>C. trifolii</i> | <i>P.<br/>medicaginis</i> |
| <b>1-Cell wall</b>                                         |                |                                                                                        |                |                    |                           |
| AI974300                                                   | TC114192       | Caffeic acid O-methyltransferase-like protein<br>( <i>Arabidopsis thaliana</i> )       |                | 0.53               | 1.48                      |
| AW127704                                                   | TC124613       | Abscisic acid and environmental stress inducible protein<br>( <i>Medicago sativa</i> ) | 2.19           | 0.20               |                           |
| <b>2-Cytoskeleton</b>                                      |                |                                                                                        |                |                    |                           |
| AW171648                                                   | TC128221       | Beta-tubulin 2 ( <i>Pisum sativum</i> )                                                |                | 0.69               | 1.44                      |
| <b>3-Membrane transport</b>                                |                |                                                                                        |                |                    |                           |
| BF006225                                                   | TC124342       | Mitochondrial phosphate transport protein G7 ( <i>Glycine max</i> )                    |                | 2.02               | 1.45                      |
| BG582785                                                   | TC116412       | Ca <sup>2+</sup> /H <sup>+</sup> -exchanging protein, ( <i>Vigna radiata</i> )         |                | 0.77               | 0.70                      |
| AI974613                                                   | TC120266       | Putative ATP synthase beta chain                                                       |                | 2.54               | 0.60                      |
| AI974231                                                   | TC128768       | Aquaporin ( <i>Zea mays</i> )                                                          |                | 0.52               | 0.54                      |
| <b>4-Vesicular trafficking, secretion, protein sorting</b> |                |                                                                                        |                |                    |                           |
| AI974290                                                   | TC128797       | Adenosylhomocysteinase ( <i>Medicago truncatula</i> )                                  | 0.32           |                    | 1.62                      |
| <b>5-Primary metabolism</b>                                |                |                                                                                        |                |                    |                           |
| AI974242                                                   | TC115626       | S-adenosylmethionine synthetase ( <i>Medicago truncatula</i> )                         | 0.49           |                    | 1.52                      |
| AW127259                                                   | TC113707       | S-adenosylmethionine synthetase ( <i>Medicago sativa</i> )                             |                | 2.39               | 1.91                      |
| AI974327                                                   | TC117283       | S-adenosylmethionine synthetase ( <i>Medicago sativa</i> )                             | 0.24           | 2.02               | 1.63                      |
| AW256410                                                   | TC114188       | Glycerinaldehyde-3-phosphate dehydrogenase ( <i>Pisum sativum</i> )                    | 0.64           |                    | 1.84                      |
| AW776463                                                   | TC141126       | Thiamin biosynthetic enzyme ( <i>Glycine max</i> )                                     | 0.50           |                    | 1.64                      |
| AI974370                                                   | TC133245       | Cytochrome b6                                                                          | 0.44           |                    | 1.75                      |
| BF520339                                                   | TC124397       | Photosystem I psaH precursor                                                           | 0.46           | 0.56               |                           |
| AW127601                                                   | TC134653       | Ribulose 1,5-bisphosphate carboxylase small subunit                                    | 0.65           | 0.41               |                           |
| <b>6-Secondary metabolism</b>                              |                |                                                                                        |                |                    |                           |
| AW207939                                                   | TC117768       | Chalcone synthase ( <i>Medicago sativa</i> )                                           |                | 4.29               | 1.62                      |
| AI974240                                                   | TC116581       | Chalcone synthase                                                                      |                | 2.74               | 1.51                      |
| AW560345                                                   | TC113451       | Chalcone reductase ( <i>Medicago sativa</i> )                                          |                | 6.13               | 1.57                      |
| AI974276                                                   | TC113451       | Chalcone reductase ( <i>Medicago sativa</i> )                                          |                | 2.87               | 1.42                      |
| AW256807                                                   | TC115787       | SRG1 ( <i>Arabidopsis thaliana</i> )                                                   |                | 2.93               | 3.39                      |
| AI974627                                                   | TC120837       | SRG1 ( <i>Arabidopsis thaliana</i> )                                                   |                | 2.90               | 3.29                      |
| AI974527                                                   | TC128258       | Isoflavone reductase ( <i>Medicago truncatula</i> )                                    |                | 4.99               | 1.92                      |
| AW559532                                                   | TC113293       | Isoflavone-7-O-methyltransferase ( <i>Medicago sativa</i> )                            |                | 2.60               | 2.28                      |
| AW256393                                                   | TC114257       | Farnesyl-pyrophosphate synthetase                                                      | 0.50           | 0.69               |                           |
| <b>8-Gene expression and RNA metabolism</b>                |                |                                                                                        |                |                    |                           |

|          |          |                                   |      |      |      |
|----------|----------|-----------------------------------|------|------|------|
| BG586838 | TC114921 | Polynucleotidyl transferase       | 1.39 |      | 0.65 |
| AW299125 | TC124369 | MADS box transcription factor ETL |      | 0.75 | 0.3  |

### 9-Protein synthesis and processing

|          |          |                                                            |      |      |      |
|----------|----------|------------------------------------------------------------|------|------|------|
| AI974446 | TC122513 | Ubiquitin                                                  | 0.33 | 1.81 | 1.38 |
| AW560057 | TC137052 | Cysteine proteinase inhibitor ( <i>Vigna unguiculata</i> ) |      | 2.50 | 1.38 |
| AI974458 | TC115507 | L3 Ribosomal protein ( <i>Medicago sativa</i> )            | 1.89 |      | 1.63 |
| AW256813 | TC126342 | Ribosome-associated protein p40 ( <i>Cicer arietinum</i> ) | 1.48 |      | 1.40 |
| AW329865 | TC116702 | Elongation factor 1-alpha (EF1-a) ( <i>Vicia faba</i> )    | 0.77 |      | 1.95 |
| AI974277 | TC119319 | Polyubiquitin ( <i>Thlaspi caerulescens</i> )              | 0.42 |      | 1.44 |
| AI974635 | TC132813 | Peptidase C1A                                              | 0.50 |      | 1.44 |
| AI974608 | TC141238 | Cysteine proteinase ( <i>Pisum sativum</i> )               | 0.47 |      | 1.45 |
| AW560212 | TC122513 | Polyubiquitin (ubq10) ( <i>Arabidopsis thaliana</i> )      |      | 0.50 | 1.37 |

### 10-Signal transduction

|          |          |                                                         |  |      |      |
|----------|----------|---------------------------------------------------------|--|------|------|
| BG645475 | TC136955 | GDP dissociation inhibitor ( <i>Nicotiana tabacum</i> ) |  | 1.74 | 1.45 |
| AI974641 | TC112641 | Cysteine peptidase ( <i>Medicago truncatula</i> )       |  | 1.57 | 2.29 |

### 11-Cell division cycle

|          |          |                                                |      |  |      |
|----------|----------|------------------------------------------------|------|--|------|
| AW127523 | TC114513 | GTP-binding protein ( <i>Cicer arietinum</i> ) | 0.59 |  | 1.51 |
|----------|----------|------------------------------------------------|------|--|------|

### 12-Miscellaneous

|          |          |                                       |  |      |      |
|----------|----------|---------------------------------------|--|------|------|
| AW559945 | TC114533 | Peroxidase ( <i>Medicago sativa</i> ) |  | 1.84 | 2.45 |
| AW127384 | TC112628 | Lipoxygenase ( <i>Pisum sativum</i> ) |  | 0.26 | 1.67 |
| AI737514 | TC127976 | Haem peroxidase                       |  | 0.44 | 0.55 |

### 13-Defense and cell rescue

|          |          |                                                          |      |      |      |
|----------|----------|----------------------------------------------------------|------|------|------|
| AW560163 | TC113538 | Thaumatococin-like protein ( <i>Malus x domestica</i> )  | 2.55 | 9.15 | 4.56 |
| AW559902 | TC125088 | Pathogenesis-related protein 4A ( <i>Pisum sativum</i> ) | 1.47 | 4.62 | 2.87 |
| AW127408 | TC131880 | PR10-1 protein ( <i>Medicago truncatula</i> )            | 1.42 | 3.13 | 1.84 |
| AW587195 | TC131880 | PR10-1 protein ( <i>Medicago truncatula</i> )            |      | 8.11 | 1.94 |
| AW561042 | TC117333 | Pathogenesis-related protein 10 ( <i>Pisum sativum</i> ) |      | 5.20 | 2.52 |
| AW587229 | TC131880 | PR10-1 protein ( <i>Medicago truncatula</i> )            |      | 7.63 | 2.04 |
| AW560467 | TC122461 | Pprg2 protein ( <i>Medicago sativa</i> )                 | 3.86 |      | 2.19 |
| BF520375 | TC133366 | Metallothionein ( <i>Glycine max</i> )                   | 0.45 |      | 1.37 |
| AW560608 | TC131359 | Metallothionein ( <i>Pisum sativum</i> )                 | 0.55 |      | 2.16 |
| AW560652 | TC115480 | Superoxide dismutase ( <i>Pisum sativum</i> )            | 0.79 |      | 1.41 |
| AW560047 | TC121035 | Class I chitinase ( <i>Medicago truncatula</i> )         |      | 2.71 | 3.19 |

### 15-Abiotic stimuli and development

|          |          |                                                    |  |      |     |
|----------|----------|----------------------------------------------------|--|------|-----|
| AW559678 | TC115897 | Aldo/keto reductase ( <i>Medicago truncatula</i> ) |  | 1.58 | 1.5 |
|----------|----------|----------------------------------------------------|--|------|-----|

### 16-Unknown function

|          |          |                                                                     |      |      |      |
|----------|----------|---------------------------------------------------------------------|------|------|------|
| AW775413 | TC122381 | Chromosome chr4 scaffold_6 ( <i>Vitis vinifera</i> )                | 0.69 |      | 0.65 |
| AI974235 | TC123393 | Chromosome chr5 scaffold_2 ( <i>Vitis vinifera</i> )                |      | 0.46 | 0.47 |
| BG580628 | TC133405 | Weakly similar to UP Q7P6G5 (Q7P6G5) Membrane protein, partial (7%) | 1.40 |      | 0.34 |

---
