# Supplementary material
Source: PubMed Central journal article supplement (PMC6640494)
Supplement: MPP-12-786-s003.pdf [file MPP-12-786-s003.pdf]

**Supplemental Table 2** Differentially expressed genes significant in more than one time point of the time course study with *P. medicaginis*.

| GenBank<br>Accession                        | TIGR TC<br>v. 8 | Functional Category<br>Gene Annotation                                                                | Fold Change |       |       |        |
|---------------------------------------------|-----------------|-------------------------------------------------------------------------------------------------------|-------------|-------|-------|--------|
|                                             |                 |                                                                                                       | 1 DAI       | 2 DAI | 5 DAI | 10 DAI |
| <b>1-Cell wall</b>                          |                 |                                                                                                       |             |       |       |        |
| AW586742                                    | TC137319        | Extensin class 1 protein precursor ( <i>Vigna unguiculata</i> )                                       |             | 1.37  | 2.06  |        |
| AW256661                                    | TC117765        | Pectinesterase inhibitor ( <i>Medicago truncatula</i> )                                               |             |       | 1.69  | 1.57   |
| AW256661                                    | TC117765        | Pectinesterase inhibitor ( <i>Medicago truncatula</i> )                                               |             |       | 1.69  | 1.52   |
| AW586969                                    | TC114923        | Syringolide-induced protein 19-1-5 ( <i>Glycine max</i> )                                             | 1.47        |       |       | 0.57   |
| BE999774                                    | TC121140        | Proline-rich protein ( <i>Medicago truncatula</i> )                                                   | 1.56        | 1.74  | 4.77  | 5.68   |
| AW585874                                    | TC119971        | Proline-rich protein ( <i>Medicago truncatula</i> )                                                   | 1.39        |       | 3.66  | 5.25   |
| AW208018                                    | TC119971        | Proline-rich protein ( <i>Medicago truncatula</i> )                                                   |             |       | 1.60  | 2.17   |
| AW125962                                    | TC116432        | PEARLI 1-like protein ( <i>Arabidopsis thaliana</i> ); extensin like protein ( <i>Populus nigra</i> ) |             | 0.71  |       | 0.63   |
| <b>3-Membrane transport</b>                 |                 |                                                                                                       |             |       |       |        |
| AW736197                                    | TC116640        | Vacuolar citrate/H <sup>+</sup> symporter ( <i>Citrus sinensis</i> )                                  | 1.39        | 1.39  | 1.57  |        |
| <b>5-Primary metabolism</b>                 |                 |                                                                                                       |             |       |       |        |
| AI737526                                    | TC113436        | Chlorophyll a/b binding protein ( <i>Medicago sativa</i> )                                            |             |       | 4.87  | 1.89   |
| AI974370                                    | TC133245        | Cytochrome b6                                                                                         |             | 0.63  | 1.74  | 1.75   |
| AW256383                                    | TC125560        | Phosphoenolpyruvate carboxylase ( <i>Medicago sativa</i> )                                            |             |       | 0.49  | 0.60   |
| AW127259                                    | TC113707        | S-adenosylmethionine synthetase                                                                       |             |       | 1.75  | 1.91   |
| AI974327                                    | TC117283        | S-adenosylmethionine synthetase                                                                       |             |       | 1.76  | 1.63   |
| AI737513                                    | TC136169        | <b>Phenylalanine ammonia-lyase (<i>Trifolium pratense</i>)</b>                                        | 1.44        |       | 1.61  |        |
| AI974230                                    | TC113431        | <b>2OG-Fe(II) oxygenase (<i>Medicago truncatula</i>)</b>                                              | 2.34        | 2.39  | 3.71  | 0.68   |
| AI974351                                    | TC136060        | Ferredoxin-NADP reductase ( <i>Pisum sativum</i> )                                                    |             | 0.71  | 0.51  |        |
| <b>6-Secondary metabolism</b>               |                 |                                                                                                       |             |       |       |        |
| AI974240                                    | TC116581        | Chalcone synthase ( <i>Medicago sativa</i> )                                                          | 2.47        |       | 5.16  | 1.62   |
| AW207939                                    | TC117768        | Chalcone synthase ( <i>Medicago sativa</i> )                                                          | 2.39        | 1.36  | 4.60  | 1.51   |
| AW587237                                    | TC118117        | Chalcone synthase ( <i>Vitis vinifera</i> )                                                           | 1.41        |       |       | 0.63   |
| AI974337                                    | TC134434        | O-methyltransferase ( <i>Glycyrrhiza echinata</i> )                                                   | 1.42        | 1.41  | 3.78  | 5.77   |
| AW559532                                    | TC113293        | Isoflavone-7-O-methyltransferase ( <i>Medicago sativa</i> )                                           |             |       | 2.23  | 2.28   |
| AW208084                                    | TC132525        | Putative chalcone isomerase 4 ( <i>Glycine max</i> )                                                  | 1.62        | 1.48  | 2.53  |        |
| AW928288                                    | TC128258        | Isoflavone reductase ( <i>Medicago truncatula</i> )                                                   | 1.71        | 1.53  | 3.13  | 1.92   |
| AW928288                                    | TC128258        | Isoflavone reductase ( <i>Medicago truncatula</i> )                                                   | 1.78        | 1.69  | 2.93  | 1.87   |
| AW560345                                    | TC113451        | Chalcone reductase ( <i>Medicago sativa</i> )                                                         | 2.10        | 1.38  | 3.70  | 1.57   |
| AI974276                                    | TC113451        | Chalcone reductase ( <i>Medicago sativa</i> )                                                         | 1.72        |       | 2.24  | 1.42   |
| AW267814                                    | TC116656        | Chalcone isomerase ( <i>Medicago sativa</i> )                                                         | 1.59        | 1.54  | 2.13  |        |
| AW256807                                    | TC115787        | Chromosome chr15 scaffold_19 ( <i>Vitis vinifera</i> )                                                | 1.58        | 1.70  | 2.99  | 3.39   |
| AI974627                                    | TC120837        | Chromosome chr15 scaffold_19 ( <i>Vitis vinifera</i> )                                                | 1.60        | 1.44  | 3.13  | 3.29   |
| BE203323                                    | TC120287        | PRD2 protein ( <i>Vigna unguiculata</i> )                                                             |             | 1.65  | 3.11  | 2.63   |
| <b>8-Gene expression and RNA metabolism</b> |                 |                                                                                                       |             |       |       |        |
| AI974628                                    | TC116221        | DELLA protein ( <i>Phaseolus vulgaris</i> )                                                           |             |       | 0.46  | 0.63   |

| <b>9-Protein synthesis and processing</b> |           |                                                                        |      |      |      |      |
|-------------------------------------------|-----------|------------------------------------------------------------------------|------|------|------|------|
| AW560057                                  | TC137052  | Cysteine proteinase inhibitor ( <i>Vigna unguiculata</i> )             |      | 1.38 | 1.99 | 1.38 |
| AI974446                                  | TC122513  | Polyubiquitin ( <i>Capsicum chinense</i> )                             |      |      | 1.78 | 1.38 |
| AW256496                                  | TC114384  | Elongation factor-1 alpha ( <i>Gossypium hirsutum</i> )                |      |      | 1.78 | 2.11 |
| BF521347                                  | TC119644  | Elongation factor 1-alpha ( <i>Manihot esculenta</i> )                 |      |      | 1.82 | 2.11 |
| <b>10-Signal transduction</b>             |           |                                                                        |      |      |      |      |
| AI974641                                  | TC112641  | Cysteine peptidase active site ( <i>Medicago truncatula</i> )          | 1.43 | 1.53 | 2.47 | 2.29 |
| AW257004                                  | TC118888  | Apyrase-like protein ( <i>Medicago truncatula</i> )                    |      |      | 1.62 | 2.05 |
| <b>12-Miscellaneous</b>                   |           |                                                                        |      |      |      |      |
| AI974587                                  | TC128799  | Beta-glucosidase ( <i>Medicago truncatula</i> )                        |      | 0.73 |      | 2.17 |
| AI737514                                  | TC127976  | Peroxidase precursor ( <i>Medicago truncatula</i> )                    |      |      | 0.44 | 0.55 |
| AW256303                                  | TC127976  | Peroxidase precursor ( <i>Medicago truncatula</i> )                    |      |      | 0.50 | 0.56 |
| AI974478                                  | TC113110  | DnaJ protein ( <i>Hevea brasiliensis</i> )                             | 1.37 |      |      | 0.55 |
| AW256487                                  | TC116922  | Peroxidase1B ( <i>Pisum sativum</i> )                                  |      | 1.70 | 1.92 |      |
| AW559945                                  | TC114533  | Peroxidase ( <i>Medicago sativa</i> )                                  |      | 1.41 | 2.66 | 2.45 |
| AW127384                                  | TC112628  | Lipoxygenase ( <i>Pisum sativum</i> )                                  |      | 0.61 |      | 1.67 |
| <b>13-Defense and cell rescue</b>         |           |                                                                        |      |      |      |      |
| AW559902                                  | TC125088  | Pathogenesis-related protein 4A ( <i>Pisum sativum</i> )               |      | 2.09 | 2.60 | 2.87 |
| AW560047                                  | TC121035  | Class I chitinase ( <i>Medicago truncatula</i> )                       | 2.40 | 2.44 | 4.34 | 3.19 |
| AW587195                                  | TC131880  | PR10-1 protein ( <i>Medicago truncatula</i> )                          | 1.49 | 1.69 | 2.88 | 1.94 |
| AW127408                                  | TC131880  | PR10-1 protein ( <i>Medicago truncatula</i> )                          | 1.55 | 1.63 | 2.37 | 1.84 |
| AW587229                                  | TC131880  | PR10-1 protein ( <i>Medicago truncatula</i> )                          | 1.48 | 1.50 | 2.94 | 2.04 |
| AW561042                                  | TC117333  | Pathogenesis-related protein 10 ( <i>Pisum sativum</i> )               | 1.92 | 2.41 | 5.01 | 2.52 |
| AW256728                                  | TC116243  | Class 10 PR protein                                                    | 1.61 | 1.85 | 3.10 | 1.75 |
| AW256330                                  | TC122461  | Pprg2 protein ( <i>Medicago sativa</i> )                               | 1.55 | 1.76 | 3.04 | 1.83 |
| AW560467                                  | TC122461  | Pprg2 protein ( <i>Medicago sativa</i> )                               | 1.64 | 1.91 | 2.94 | 2.19 |
| AI974601                                  | TC122461  | Pprg2 protein ( <i>Medicago sativa</i> )                               | 1.76 | 1.73 | 3.35 | 2.39 |
| AW584270                                  | TC113509  | Chitinase class III, basic ( <i>Medicago truncatula</i> )              | 1.79 | 2.53 | 2.60 | 4.46 |
| AW560163                                  | TC113538  | Thaumatococin-like protein ( <i>Malus x domestica</i> )                |      | 2.84 | 7.90 | 4.56 |
| AW560813                                  | TC117220  | Glycoside hydrolase, family 18                                         |      |      | 2.34 | 3.28 |
| AW256887                                  | TC119852  | Functional candidate resistance protein KR1 ( <i>Glycine max</i> )     |      |      | 1.74 | 0.75 |
| <b>14-Symbiosis</b>                       |           |                                                                        |      |      |      |      |
| BG587088                                  | TC124499  | Early nodulin N93 ( <i>Glycine max</i> )                               |      |      | 3.73 | 0.44 |
| BG583283                                  | TC119488  | Nodulin 25 ( <i>Medicago truncatula</i> )                              |      | 0.30 |      | 0.39 |
| AW777094                                  | TC113614  | Nodulin 25 ( <i>Medicago truncatula</i> )                              |      | 0.35 |      | 0.41 |
| AW980582                                  | TC113614  | Nodulin 25 ( <i>Medicago truncatula</i> )                              |      | 0.29 |      | 0.39 |
| <b>16-Unknown function</b>                |           |                                                                        |      |      |      |      |
| AW573905                                  | TC125381  | Chromosome chr8 scaffold_23 ( <i>Vitis vinifera</i> )                  |      | 1.21 |      | 0.52 |
| AI974358                                  | TC121716  | AX110P -like embryogenesis-associated protein ( <i>Daucus carota</i> ) |      | 0.79 |      | 0.65 |
| AI974783                                  | Singleton |                                                                        |      | 0.61 | 1.28 | 0.39 |
| AI974794                                  | TC137063  | Uncharacterized transporter BUsg_450                                   |      | 0.64 |      | 0.49 |
